# Supplementary material
Source: PubMed Central journal article supplement (PMC3432263)
Supplement: NIHMS399849-supplement-1_si_001.pdf [file NIHMS399849-supplement-1_si_001.pdf]

## Light-triggered Disassembly of Amyloid Fibrils

Thomas J. Measey and Feng Gai\*

Department of Chemistry, University of Pennsylvania, Philadelphia, PA 19104, USA

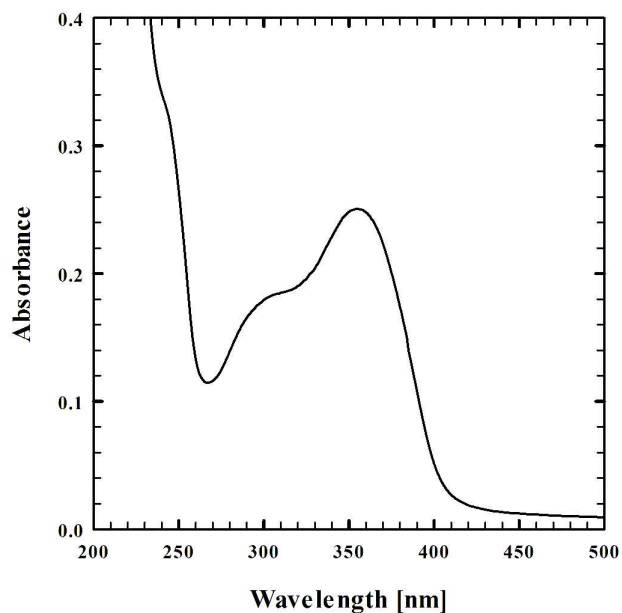

**Figure S1:** UV-Vis absorption spectrum of a 60  $\mu\text{M}$  solution of F19K\* in 50 mM phosphate buffer (pH 7), illustrating the absorption band of the cage, centered at 350 nm.

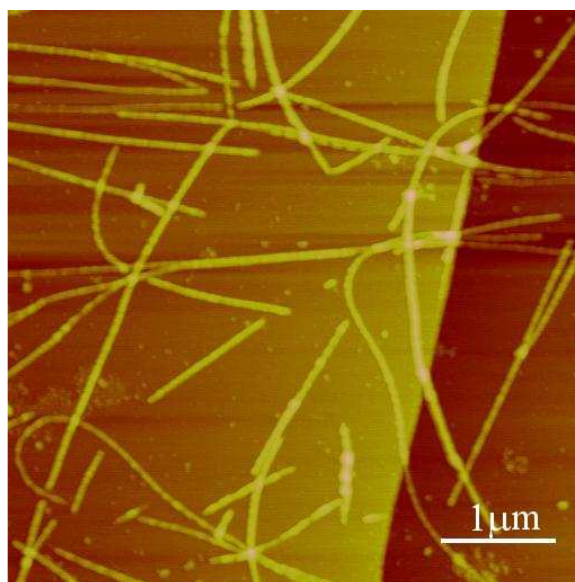

**Figure S2:** A representative AFM image of 100% F19K\*, illustrating the capacity to form amyloid fibrils.

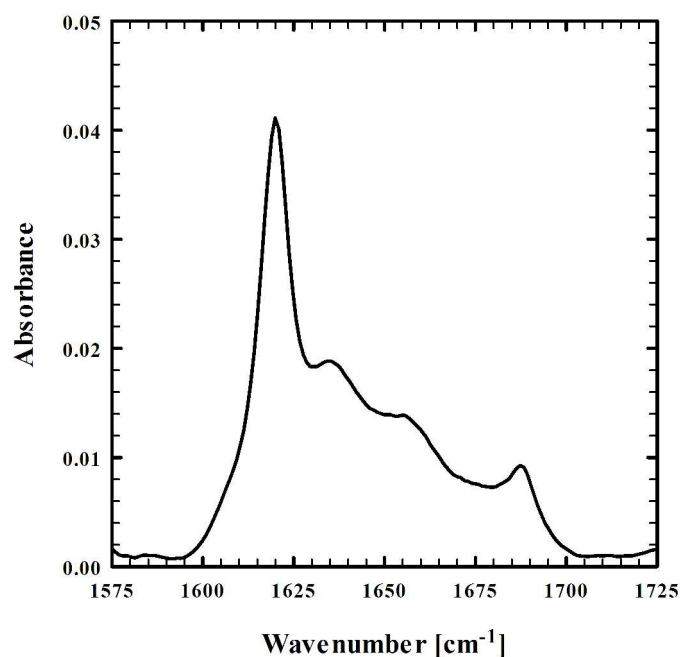

**Figure S3:** FTIR spectrum in the amide I' region of a 640  $\mu\text{M}$  peptide solution in  $\text{D}_2\text{O}$  (pH 3), containing a 1:1 mixture of F19K\* and wild-type  $\text{A}\beta_{16-22}$ , illustrating the capacity of F19K\* to co-aggregate with an equal amount of the wild-type peptide.

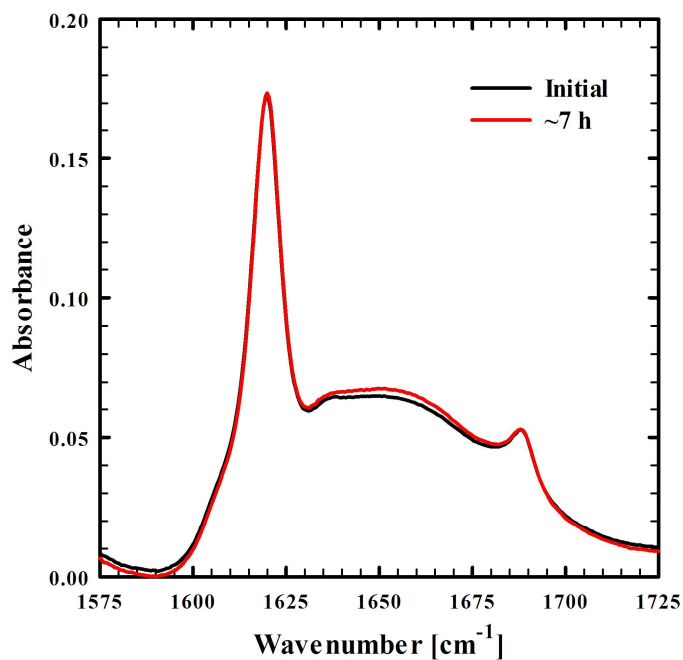

**Figure S4:** FTIR spectra (in the amide I' region) of a 1–2 mM solution (pH 2) of wild-type  $\text{A}\beta_{16-22}$  before and after irradiation at 355 nm for the indicated amount of time.
